# Supplementary material
Source: publisher figshare collection journal article supplement (https://acs.figshare.com/ndownloader/files/3914665)
Supplement: Supplementary file 1 [file 3914665]

**Supporting information for: Dynamics and morphological outcomes in thin-film spherical crystallization of glycine from microfluidic emulsions – experimental studies and modeling**

Arpad I. Toldy<sup>†‡</sup>, Lu Zheng<sup>‡</sup>, Abu Zayed Md. Badruddoza<sup>‡</sup>, T. Alan Hatton<sup>§†</sup>, Saif A. Khan<sup>†,‡,\*</sup>

<sup>†</sup>Chemical and Pharmaceutical Engineering Program, Singapore-MIT Alliance, National University of Singapore, 4 Engineering Drive 3, E4-04-10, Singapore 117576, Singapore

<sup>‡</sup>Department of Chemical and Biomolecular Engineering, 4 Engineering Drive 4, National University of Singapore, Singapore 117576, Singapore

<sup>§</sup>Department of Chemical Engineering, Massachusetts Institute of Technology, 77 Massachusetts Avenue, 66-309, Cambridge MA02139

\*Corresponding Author. Email: [chesakk@nus.edu.sg](mailto:chesakk@nus.edu.sg)

**I. Schematic of the experimental setup**

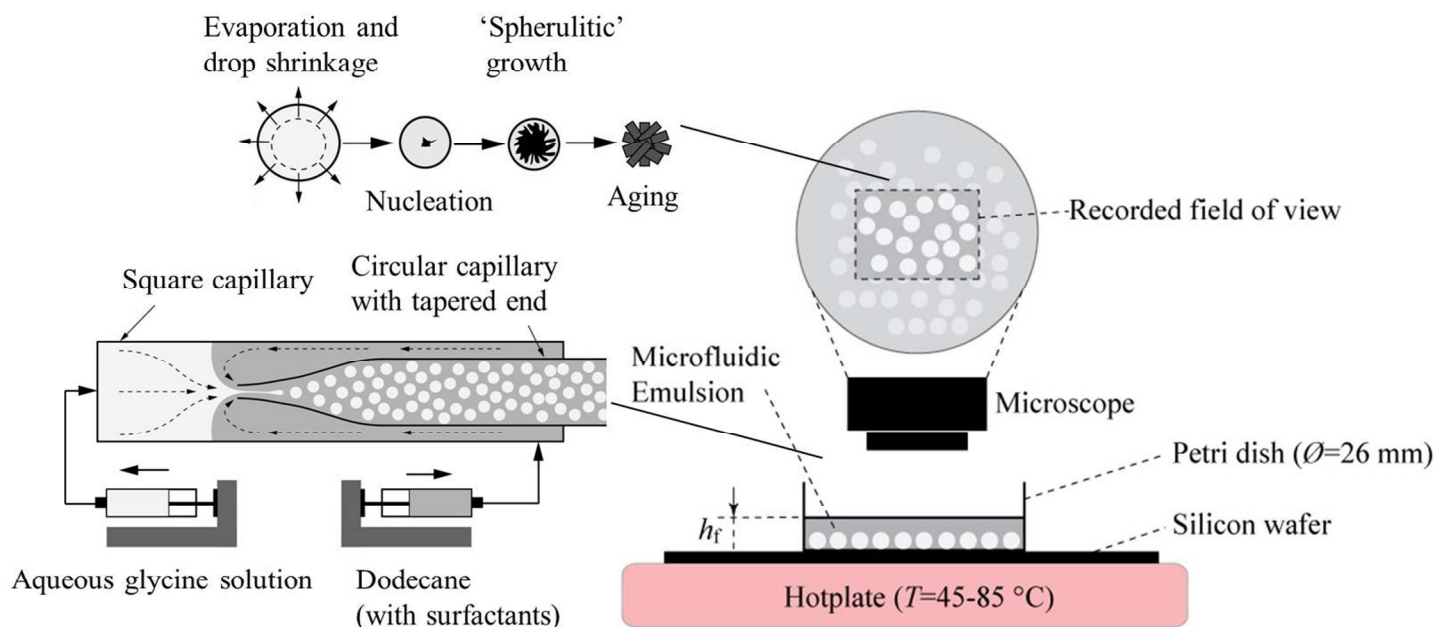

Figure S1: Schematic of experimental setup. Emulsion generation is performed in a concentric microfluidic glass capillary setup, where a square capillary (ID=1 mm) houses a tapered round capillary (OD= 1 mm). The two ends of the square capillary function as inlets and the round capillary functions as a collection tube and outlet. The continuous phase (CP) of dodecane (with dissolved surfactants) and a dispersed phase (DP) of aqueous glycine are infused by syringe

pumps into the square capillary. The emulsions are collected in a heated glass petri dish where evaporative crystallization occurs.

## II. The relationship between film thickness and shrinkage at a constant temperature – an example

Figure S2 presents an empirical relationship between the effective film thickness  $h_e$ , (defined as  $h_f - d_0$ , where  $h_f$  is the dispensed film thickness, and  $d_0$  is the initial droplet diameter) and the linear shrinkage rate  $d'$  at  $T=65^\circ\text{C}$  for all nine experiments at this temperature. It can be seen that as the film thickness increases, the shrinkage rate decreases with the cube of the film thickness. In a purely diffusive case, we could expect a linear decrease, which suggests the presence of a convective enhancement (possibly due to natural convection) in this system.

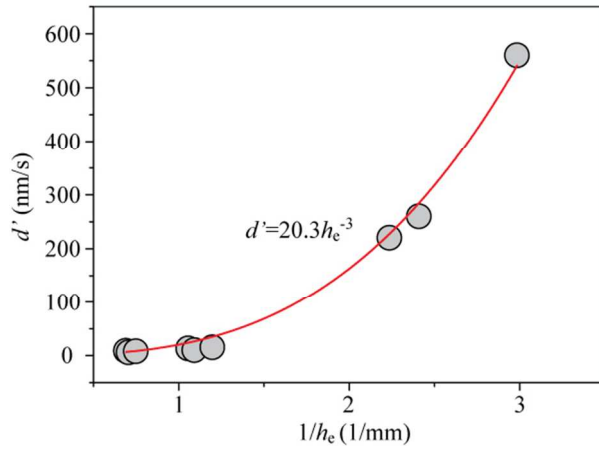

Figure S2: An empirical relationship between the effective film thickness  $h_e$ , (defined as  $h_f - d_0$ , where  $h_f$  is the dispensed film thickness, and  $d_0$  is the initial droplet diameter) and the linear shrinkage rate  $d'$  at  $T=65^\circ\text{C}$  for all nine experiments at this temperature.

### III. The calculated values of classical nucleation theory parameters

Table S1 presents the calculated values of CNT parameters at the temperatures used in this study, while Figure S3 shows the parameter  $B$  as a function of continuous phase temperature. Fitted  $B$  values were used for modeling.

| #       | $T$ (°C) | $T_{CP}$ (°C) | $\sigma$ (mJ/m <sup>2</sup> ) | $B$  |
|---------|----------|---------------|-------------------------------|------|
| 10      | 45       | 39            | 12.8                          | 2.69 |
| V3      | 50       | 45            | 12.4                          | 2.28 |
| 11, V1  | 55       | 48            | 12.2                          | 2.13 |
| V4      | 60       | 52            | 11.9                          | 1.89 |
| 1-9, V5 | 65       | 59            | 12.1                          | 1.59 |
| V6      | 70       | 63            | 11.2                          | 1.44 |
| 12, V2  | 75       | 68            | 11.0                          | 1.27 |
| 13      | 85       | 78            | 10.5                          | 1.03 |

Table S1: the calculated value of classical nucleation parameters under the temperatures used in this study. #: experiment label (as seen in Table 1 and Table 4);  $T$ : heating temperature;  $T_{CP}$ : measured continuous phase temperature;  $\sigma$ : interfacial tension between the nucleus and the crystallizing solution;  $B$ : dimensionless exponent  $B$ .

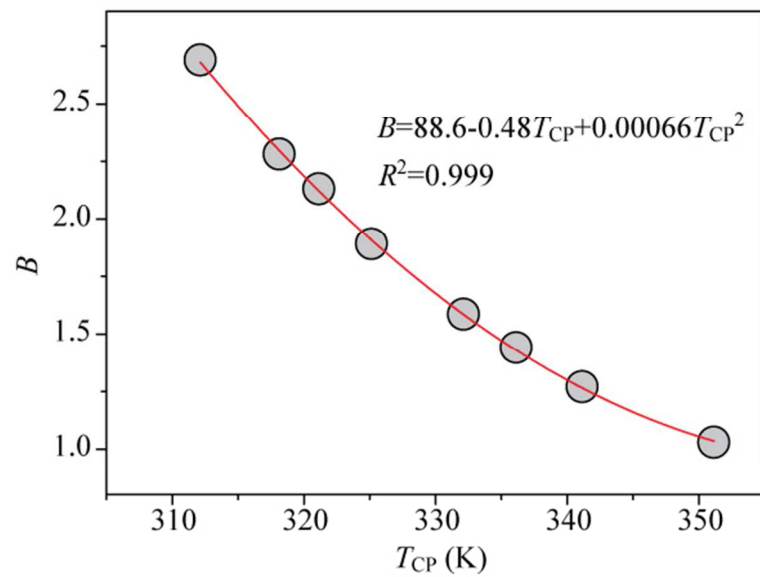

Figure S3: parameter  $B$  as a function of continuous phase temperature along with the polynomial fit used for modeling.

#### IV. Fitting of the CNT parameter $A$

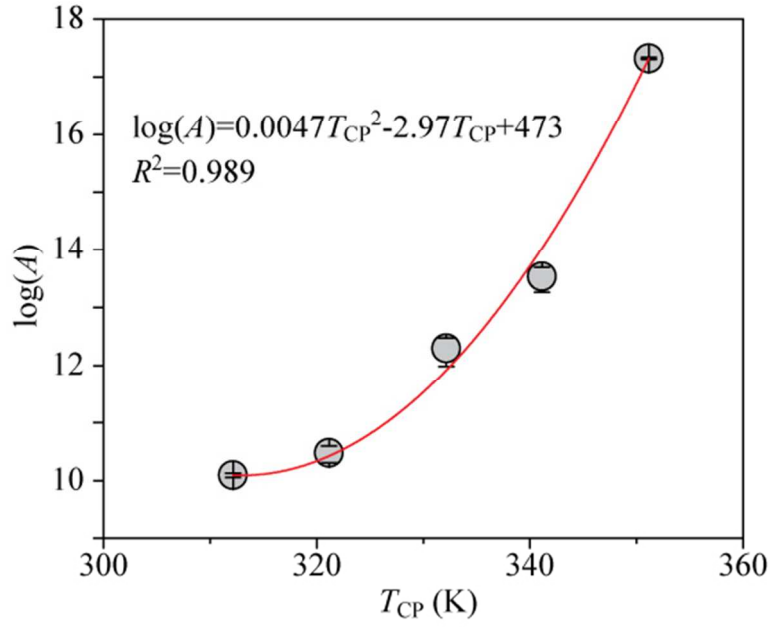

Figure S4: Experimentally derived  $\log(A)$  values as a function of continuous phase temperature along with the fitted quadratic curve that was used in the modeling. This fit implies that the relationship is of the form  $A = A_0 \exp(f(T))$ , which is consistent with previous reports.<sup>1</sup>

## V. Shrinkage Rate and Temperature

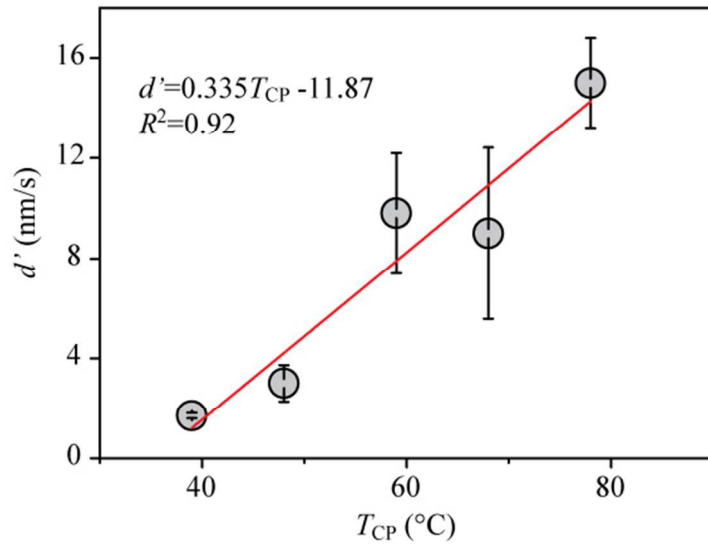

Figure S5: Experimentally measured shrinkage rates at various continuous phase temperature along with the linear fit used in the simulations for Figure 6d.

### References:

- (1) Pina, C. M.; Putnis, A., The kinetics of nucleation of solid solutions from aqueous solutions: a new model for calculating non-equilibrium distribution coefficients. *Geochimica et Cosmochimica Acta* **2002**, 66, (2), 185-192.
